# Supplementary material
Source: HighWire-hosted journal article supplement (http://www.annfammed.org/highwire/filestream/8746/field_highwire_adjunct_files/0/HendriksenFromAuAFM-415-15_Supp_App_Table_1_JH.pdf)
Supplement: HendriksenFromAuAFM-415-15_Supp_App_Table_1_JH.pdf [file HendriksenFromAuAFM-415-15_Supp_App_Table_1_JH.pdf]

## Supplemental materials for:

Hendriksen J, Lucassen W, Erkens P, Stoffers HE, van Weert HC, Büller HR, Hoes AW, Moons KG, Geersing G. Ruling Out Pulmonary Embolism in Primary Care: Comparison of the Diagnostic Performance of “Gestalt” and the Wells Rule. *Ann Fam Med*. 2016;14(3):227-234.

**Supplemental Figure 1- Visual Analogue Scale used to estimate “gestalt”**

**Please indicate the probability of this patients having a pulmonary embolism on a scale from 0%-100%.**

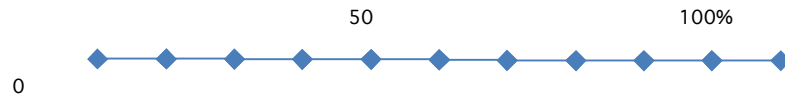

**Supplemental Table 1- Overview of items of the original Wells PE rule**

|                                   | <b>Regression coefficients</b> | <b>Points</b> |
|-----------------------------------|--------------------------------|---------------|
| Clinical signs & symptoms DVT     | 1.8                            | 3.0           |
| Alternative diagnosis less likely | 1.5                            | 3.0           |
| Heart rate > 100 bpm              | 1.1                            | 1.5           |
| Immobilization                    | 0.92                           | 1.5           |
| Previous VTE                      | 0.87                           | 1.5           |
| Haemoptysis                       | 0.87                           | 1.0           |
| Malignancy                        | 0.81                           | 1.0           |
| <i>Cut-off for PE unlikely</i>    |                                | $\leq 4$      |

DVT= deep venous thrombosis; bpm= beats per minute; VTE= venous thromboembolism; PE= pulmonary embolism
